# Supplementary material
Source: MDPI journal article supplement (https://www.mdpi.com/2076-3417/10/3/799)
Supplement: s1 [file s1]

## Supplementary

**Table S1.** The mean value ( $\pm$  Standard Deviation) of EMG activity for each gait phase under the vibratory stimulation conditions at threshold intensity in each muscle, \* indicates significant difference through paired t-test from None ( $p < 0.05$ ) and + indicates significant difference through paired t-test between Th-Max and Th-Min ( $p < 0.05$ )

| Gait phase          | Vibratory stimulation conditions | Tibialis anterior (TA) | Gastrocnemius Lateralis (GL) | Gastrocnemius Medialis (GM) | Soleus (Sol)                   |
|---------------------|----------------------------------|------------------------|------------------------------|-----------------------------|--------------------------------|
| Weight Acceptance   | None                             | 43.800 $\pm$ 10.790    | 5.207 $\pm$ 1.059            | 4.732 $\pm$ 0.575           | 14.226 $\pm$ 3.228             |
|                     | Th-Max                           | 46.459 $\pm$ 9.400*    | 5.972 $\pm$ 1.126*           | 5.176 $\pm$ 1.592           | 16.877 $\pm$ 3.275*            |
|                     | Th-Min                           | 45.478 $\pm$ 11.490    | 5.929 $\pm$ 1.306*           | 3.820 $\pm$ 0.783*+         | 10.851 $\pm$ 3.128*+           |
| Pull-Up             | None                             | 19.921 $\pm$ 3.770     | 7.313 $\pm$ 0.612            | 7.420 $\pm$ 2.298           | 19.840 $\pm$ 0.908             |
|                     | Th-Max                           | 18.828 $\pm$ 4.518*    | 8.582 $\pm$ 0.335*           | 8.813 $\pm$ 3.529*          | 20.006 $\pm$ 2.529             |
|                     | Th-Min                           | 16.458 $\pm$ 3.951*+   | 8.888 $\pm$ 0.372*+          | 9.236 $\pm$ 3.121*          | 19.771 $\pm$ 3.949             |
| Forward Continuance | None                             | 17.178 $\pm$ 9.224     | 39.144 $\pm$ 27.413          | 48.612 $\pm$ 26.313         | 49.305 $\pm$ 25.030            |
|                     | Th-Max                           | 18.236 $\pm$ 11.429*   | 36.981 $\pm$ 26.955*         | 46.671 $\pm$ 26.825*        | 47.721 $\pm$ 25.490*           |
|                     | Th-Min                           | 16.536 $\pm$ 10.516*+  | 38.034 $\pm$ 28.143          | 47.624 $\pm$ 24.896         | 46.855 $\pm$ 24.977*           |
| Foot Clearance      | None                             | 70.105 $\pm$ 7.207     | 4.074 $\pm$ 0.704            | 2.917 $\pm$ 0.771           | 7.946 $\pm$ 0.275              |
|                     | Th-Max                           | 68.525 $\pm$ 6.762     | 3.921 $\pm$ 0.519            | 2.866 $\pm$ 0.309           | 9.120 $\pm$ 1.005*             |
|                     | Th-Min                           | 70.562 $\pm$ 7.072*    | 4.165 $\pm$ 1.038            | 2.947 $\pm$ 0.850           | 7.683 $\pm$ 0.527 <sup>+</sup> |
| Foot Placement      | None                             | 54.382 $\pm$ 9.044     | 5.913 $\pm$ 0.885            | 7.658 $\pm$ 2.266           | 9.164 $\pm$ 0.846              |
|                     | Th-Max                           | 45.925 $\pm$ 8.048*    | 5.617 $\pm$ 0.447*           | 5.691 $\pm$ 1.031*          | 7.868 $\pm$ 0.467*             |
|                     | Th-Min                           | 50.048 $\pm$ 7.986*+   | 5.699 $\pm$ 0.836            | 6.142 $\pm$ 1.787*          | 7.481 $\pm$ 0.826*+            |

Values are represented as mean  $\pm$  standard deviation

\* Significantly different from None,  $p < 0.05$

+ Significantly different between Th-Max and Th-Min,  $p < 0.05$

**Table S2.** The mean value ( $\pm$  Standard Deviation) of EMG activity for each gait phase according to the vibratory stimulation conditions at sub-threshold intensity in each muscle, \* indicates significant difference through paired t-test from None ( $p < 0.05$ ) and + indicates significant difference between Sub-Max and Sub-Min ( $p < 0.05$ )

| Gait phase          | Vibratory stimulation conditions | Tibialis anterior (TA)       | Gastrocnemius Lateralis (GL) | Gastrocnemius Medialis (GM) | Soleus (Sol)                |
|---------------------|----------------------------------|------------------------------|------------------------------|-----------------------------|-----------------------------|
| Weight Acceptance   | None                             | 43.800 ± 10.790              | 5.207 ± 1.059                | 4.732 ± 0.575               | 14.226 ± 3.228              |
|                     | Sub-Max                          | 41.409 ± 10.093*             | 5.965 ± 1.470*               | 4.716 ± 0.739               | 13.117 ± 2.905*             |
|                     | Sub-Min                          | 41.879 ± 13.666              | 5.120 ± 1.147 <sup>+</sup>   | 4.366 ± 0.493               | 13.787 ± 2.976              |
| Pull-Up             | None                             | 19.921 ± 3.770               | 7.313 ± 0.612                | 7.420 ± 2.298               | 19.840 ± 0.908              |
|                     | Sub-Max                          | 15.037 ± 2.905*              | 7.244 ± 1.335                | 7.854 ± 5.205               | 18.778 ± 3.573*             |
|                     | Sub-Min                          | 13.369 ± 2.240* <sup>+</sup> | 8.068 ± 1.000* <sup>+</sup>  | 9.088 ± 5.482 <sup>+</sup>  | 22.714 ± 3.958 <sup>+</sup> |
| Forward Continuance | None                             | 17.178 ± 9.224               | 39.144 ± 27.413              | 48.612 ± 26.313             | 49.305 ± 25.030             |
|                     | Sub-Max                          | 19.083 ± 12.585*             | 38.369 ± 27.044              | 49.677 ± 27.376             | 48.518 ± 26.175             |
|                     | Sub-Min                          | 17.147 ± 11.014 <sup>+</sup> | 38.496 ± 27.909              | 49.124 ± 26.338             | 48.611 ± 25.871*            |
| Foot Clearance      | None                             | 70.105 ± 7.207               | 4.074 ± 0.704                | 2.917 ± 0.771               | 7.946 ± 0.275               |
|                     | Sub-Max                          | 75.357 ± 6.583*              | 3.403 ± 0.238*               | 2.263 ± 0.230*              | 7.578 ± 0.806               |
|                     | Sub-Min                          | 70.829 ± 7.101 <sup>+</sup>  | 4.467 ± 0.583* <sup>+</sup>  | 3.574 ± 1.084* <sup>+</sup> | 8.055 ± 0.312 <sup>+</sup>  |
| Foot Placement      | None                             | 54.382 ± 9.044               | 5.913 ± 0.885                | 7.658 ± 2.266               | 9.164 ± 0.846               |
|                     | Sub-Max                          | 49.384 ± 10.165*             | 5.264 ± 0.623*               | 6.058 ± 1.597*              | 7.157 ± 1.006*              |
|                     | Sub-Min                          | 48.644 ± 8.259*              | 5.196 ± 0.451*               | 6.380 ± 0.938*              | 8.516 ± 0.598* <sup>+</sup> |

Values are represented as mean ± standard deviation

\* Significantly different from None,  $p < 0.05$

+ Significantly different between Sub-Max and Sub-Min,  $p < 0.05$
